# Supplementary material for: A Glycosylphosphatidylinositol-Anchored Carbonic Anhydrase-Related Protein of Toxoplasma gondii Is Important for Rhoptry Biogenesis and Virulence
Source: PubMed Central journal article supplement (PMC5437132; doi:10.1128/msphere.00027-17), 2017-05-17
Supplement: sph003172284sf4.pdf [file sph003172284sf4.pdf]

|               |     |   |   |   |   |   |   |   |   |   |   |   |   |   |   |   |   |   |   |   |   |   |   |   |   |   |   |   |     |
|---------------|-----|---|---|---|---|---|---|---|---|---|---|---|---|---|---|---|---|---|---|---|---|---|---|---|---|---|---|---|-----|
| <i>PfCA</i>   | 297 | Q | I | H | F | H | A | P | S | E | H | T | F | Q | G | S | G | N | R | R | E | I | E | M | Q | I | F | H | 323 |
| <i>PyCAh</i>  | 420 | H | I | N | F | H | S | P | S | E | H | T | F | E | G | S | G | N | R | R | H | I | E | M | Q | I | Y | H | 446 |
| <i>PbCAh</i>  | 326 | H | I | N | F | H | S | P | S | E | H | T | F | E | G | S | G | N | R | R | H | I | E | M | Q | I | Y | H | 352 |
| <i>TeCAh</i>  | 194 | H | I | D | F | H | S | P | S | E | H | T | F | E | G | S | A | N | R | R | Q | I | E | M | Q | I | W | H | 220 |
| <i>TpCAh</i>  | 198 | H | I | D | F | H | S | P | S | E | H | T | F | D | G | S | A | N | R | R | Q | I | E | M | Q | I | W | H | 224 |
| <i>EtCAh</i>  | 207 | Q | I | L | F | H | S | P | S | E | H | T | F | Q | G | E | A | N | R | R | E | I | E | M | Q | I | W | H | 233 |
| <i>NcCAh</i>  | 234 | H | I | F | F | H | S | P | S | E | H | T | F | Q | G | E | A | N | R | R | E | I | E | M | Q | I | W | H | 260 |
| <i>TgCARP</i> | 231 | H | I | F | F | H | S | P | S | E | H | T | F | Q | G | E | A | N | R | R | E | I | E | M | Q | I | W | H | 257 |

**FIG S1**
