# Supplementary material for: A Glycosylphosphatidylinositol-Anchored Carbonic Anhydrase-Related Protein of Toxoplasma gondii Is Important for Rhoptry Biogenesis and Virulence
Source: PubMed Central journal article supplement (PMC5437132; doi:10.1128/msphere.00027-17), 2017-05-17

Figure S4

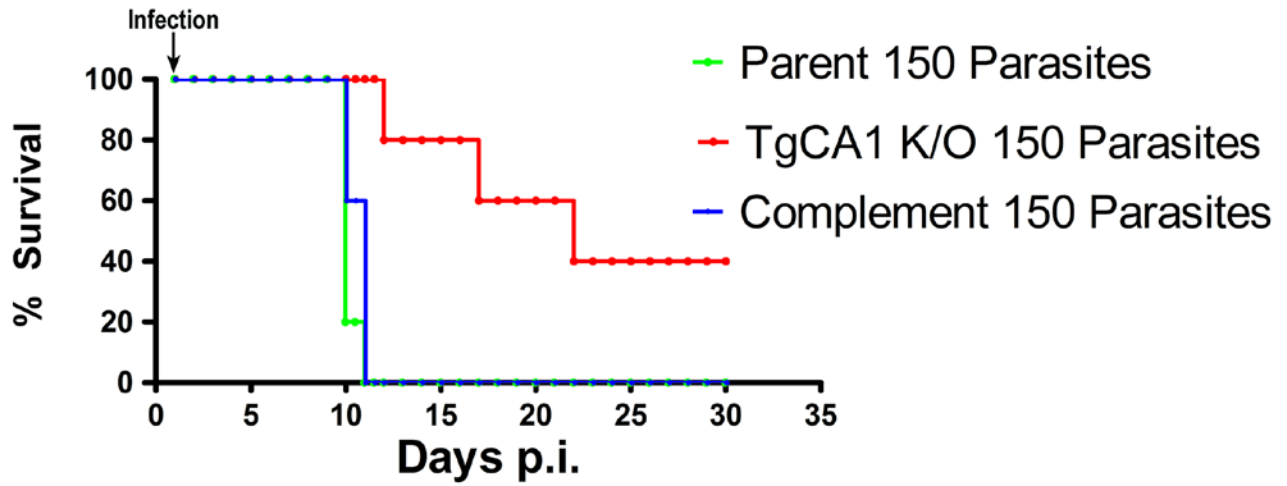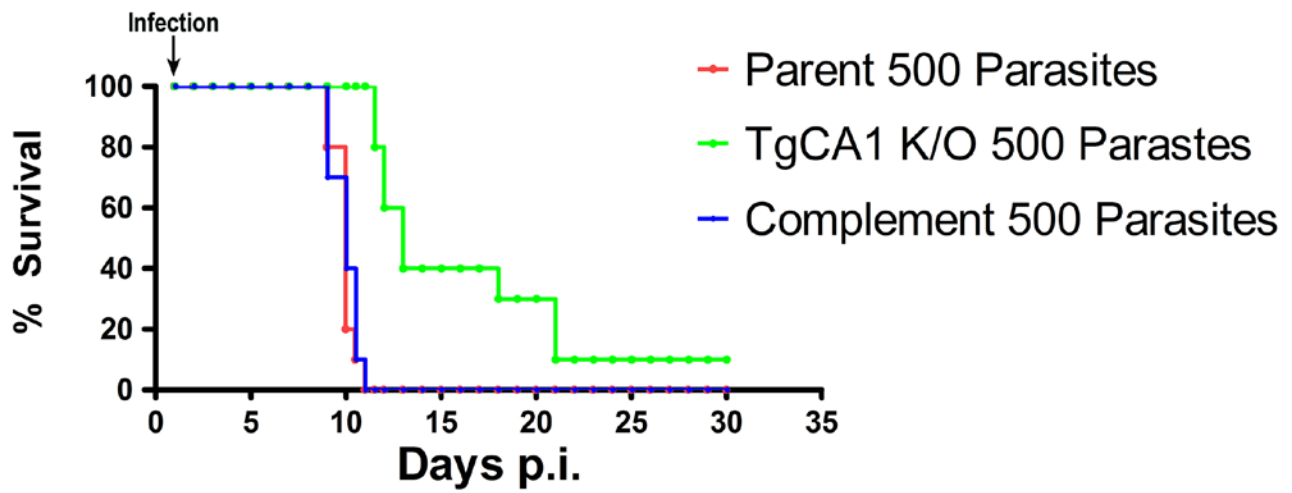

Supplement: sph003172284sf7.pdf [file sph003172284sf7.pdf]
