# Supplementary material for: A Glycosylphosphatidylinositol-Anchored Carbonic Anhydrase-Related Protein of Toxoplasma gondii Is Important for Rhoptry Biogenesis and Virulence
Source: PubMed Central journal article supplement (PMC5437132; doi:10.1128/msphere.00027-17), 2017-05-17
Supplement: sph003172284sf8.pdf [file sph003172284sf8.pdf]

Figure S5

WT 485 SKEGAQMFQGWFS AAGEHTFGHSGTALAFATAALVFLNTVGI \*

GPI1 485 SKEGAQMFQK IDEVARLHTFGHSGTALAFATAALVFLNTVGI \*
