# Supplementary material for: A Glycosylphosphatidylinositol-Anchored Carbonic Anhydrase-Related Protein of Toxoplasma gondii Is Important for Rhoptry Biogenesis and Virulence
Source: PubMed Central journal article supplement (PMC5437132; doi:10.1128/msphere.00027-17), 2017-05-17
Supplement: sph003172284st1.pdf [file sph003172284st1.pdf]

**Table S1**

| Organism                                             | Accession number/ NCBI | EuPathDB ID   | Reference |
|------------------------------------------------------|------------------------|---------------|-----------|
| <i>Homo sapiens</i> , (Isoform II), <i>HuCA2</i>     | AAH11949.1             | --            | 1, 2      |
| <i>Homo sapiens</i> , (Isoform I), <i>HuCA1</i>      | NP_001158302.1         | --            | 2         |
| <i>Neisseria gonorrhoeae</i> , <i>NgCAh</i>          | WP_003688976.1         | NCLIV_006180  | 3         |
| <i>Plasmodium falciparum</i> 3D7, <i>PfCA</i>        | XP_001348081.2         | PF3D7_1140000 | 4         |
| <i>Plasmodium yoelli</i> 17XNL, <i>PvCAh</i>         | XP_726574.1            | PY00744       |           |
| <i>Plasmodium berghei</i> ANKA, <i>PbCAh</i>         | XP_676575.1            | PBANKA_090900 |           |
| <i>Theileria equii</i> , <i>TeCAh</i>                | XP_004828973.1         | BEWA_021550   |           |
| <i>Theileria parva</i> , <i>TpCAh</i>                | XP_764978.1            | TP02_0412     |           |
| <i>Neospora caninum</i> Liverpool, <i>NcCAh</i>      | XP_003880177.1         | NCLIV_006180  |           |
| <i>Eimeria tenella</i> Houghton, <i>EtCAh</i>        | XP_013233689.1         | ETH_00027955  |           |
| <i>Toxoplasma gondii</i> GT1, <i>TgCA_RP</i>         | XP_002371137.1         | TGME49_297070 |           |
| <i>Thalassiosira oceanica</i> , <i>ToCdCAh</i>       | K0SZQ0                 |               |           |
| <i>Ostreococcus tauri</i> , <i>OtCdCAh</i>           | A0A090N4Y7             |               |           |
| <i>Psuedoalteromonas</i> sp., <i>PsCdCAh</i>         | A0A0A7EH23             |               |           |
| <i>Escherichia coli</i> , <i>yadF</i> , <i>EcCA1</i> | C3TN07                 |               |           |
| <i>Escherichia coli</i> , <i>EcCA2</i>               | P61517                 |               |           |
| <i>Salmonella typhimurium</i> , <i>StCAh</i>         | Q8ZRS0                 |               |           |
| <i>Yersinia pestis</i> , <i>yadF</i> , <i>YpCAh</i>  | Q0WBN9                 |               |           |

**References:**

1. Kiefer, L. L. & Fierke, C. A. Functional characterization of human carbonic anhydrase II variants with altered zinc binding sites. *Biochem.* **33**, 15233-15240 (1994).
2. Khalifah, R. G. The carbon dioxide hydration activity of carbonic anhydrase. I. Stop-flow kinetic studies on the native human isoenzymes B and C. *J. Biol. Chem.* **246**, 2561-2573 (1971).
3. Elleby, B., Chirica, L. C., Tu, C., Zeppezauer, M. & Lindskog, S. Characterization of carbonic anhydrase from *Neisseria gonorrhoeae*. *Eur. J. Biol. Chem./ FEBS* **268**, 1613-1619 (2001).
4. De Simone, G., Di Fiore, A., Capasso, C. & Supuran, C. T. The zinc coordination pattern in the eta-carbonic anhydrase from *Plasmodium falciparum* is different from all other carbonic anhydrase genetic families. *Bioorg. Med. Chem. Lett.* **25**, 1385-1389, (2015)
