# Supplementary material for: A Glycosylphosphatidylinositol-Anchored Carbonic Anhydrase-Related Protein of Toxoplasma gondii Is Important for Rhoptry Biogenesis and Virulence
Source: PubMed Central journal article supplement (PMC5437132; doi:10.1128/msphere.00027-17), 2017-05-17
Supplement: sph003172284st2.pdf [file sph003172284st2.pdf]

**Table S2**

| Organism                     | EUPath ID     | Pred-GPI | PredGPI Specificity | GPI-SOM |
|------------------------------|---------------|----------|---------------------|---------|
| <i>Toxoplasma gondii</i>     | TGME49_297070 | Yes      | 99.5%               | Yes     |
| <i>Neospora caninum</i>      | NCLIV_006180  | Yes      | 99.5%               | Yes     |
| <i>Eimeria tenella</i>       | ETH_00027955  | Yes      | 100%                | Yes     |
| <i>Theileria equi</i>        | BEWA_021550   | Yes      | 99.8%               | Yes     |
| <i>Theileria parva</i>       | TP02_0412     | Yes      | 99.9%               | Yes     |
| <i>Plasmodium falciparum</i> | PF3D7_1140000 | No       | 74.8%               | No      |
| <i>Plasmodium yoelli</i>     | PY00744       | Yes      | 99.6%               | Yes     |
| <i>Plasmodium berghei</i>    | PBANKA_021550 | Yes      | 99.1%               | Yes     |
